# Supplementary material
Source: Springer Nature journal article supplement (https://www.springermedizin.de/resource/supplementary/12943_2003_46_MOESM4_ESM.pdf/9553318)

0.1% serum

10% serum

0.1% serum

10% serum

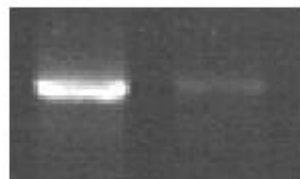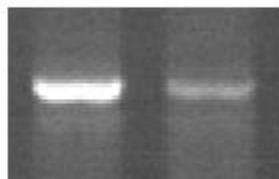

← p8

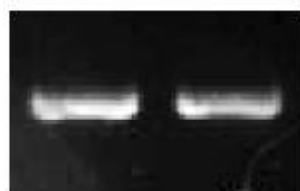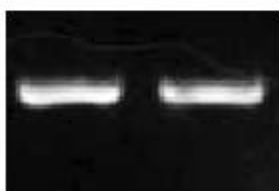

← RL3

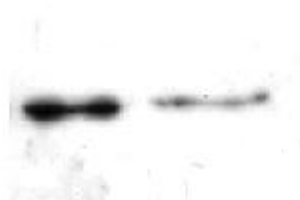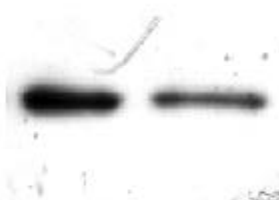

← p8

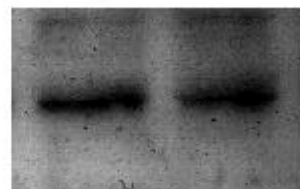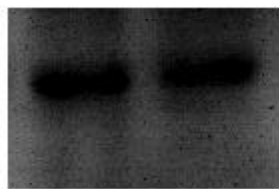

←  $\beta$ -tubulin

Panc-1

BxPc-3

Supplement: MOESM4 [file 9553318]
